# Supplementary material for: Solid state coordination chemistry: construction of 2D networks and 3D frameworks from phosphomolybdate clusters and binuclear Cu(ii) complexes. The syntheses and structures of [{Cu2(tpypyz)(H2O)2}(Mo5O15)(HOPO3)2]·nH2O [n = 2, 3; tpypyz = tetra(2-pyridyl)pyrazine]
Source: Royal Society of Chemistry journal article supplement (doi:10.1039/b105563c), 2001-01-01
Supplement: b105563c2.doc [file b105563c2.doc]

**Supplementary Materials**

Solid State Coordination Chemistry: Construction of 2D Networks and 3D Frameworks from Phosphomolybdate Clusters and Binuclear Cu(II) Complexes. The Syntheses and Structures of [{Cu2(tpypyz)(H2O)2}Mo5O15(HOPO3)2]·*n*H2O (*n* = 2 and 3; tpypyz = tetra(2-pyridyl)pyrazine)

Eric Burkholder and Jon Zubieta


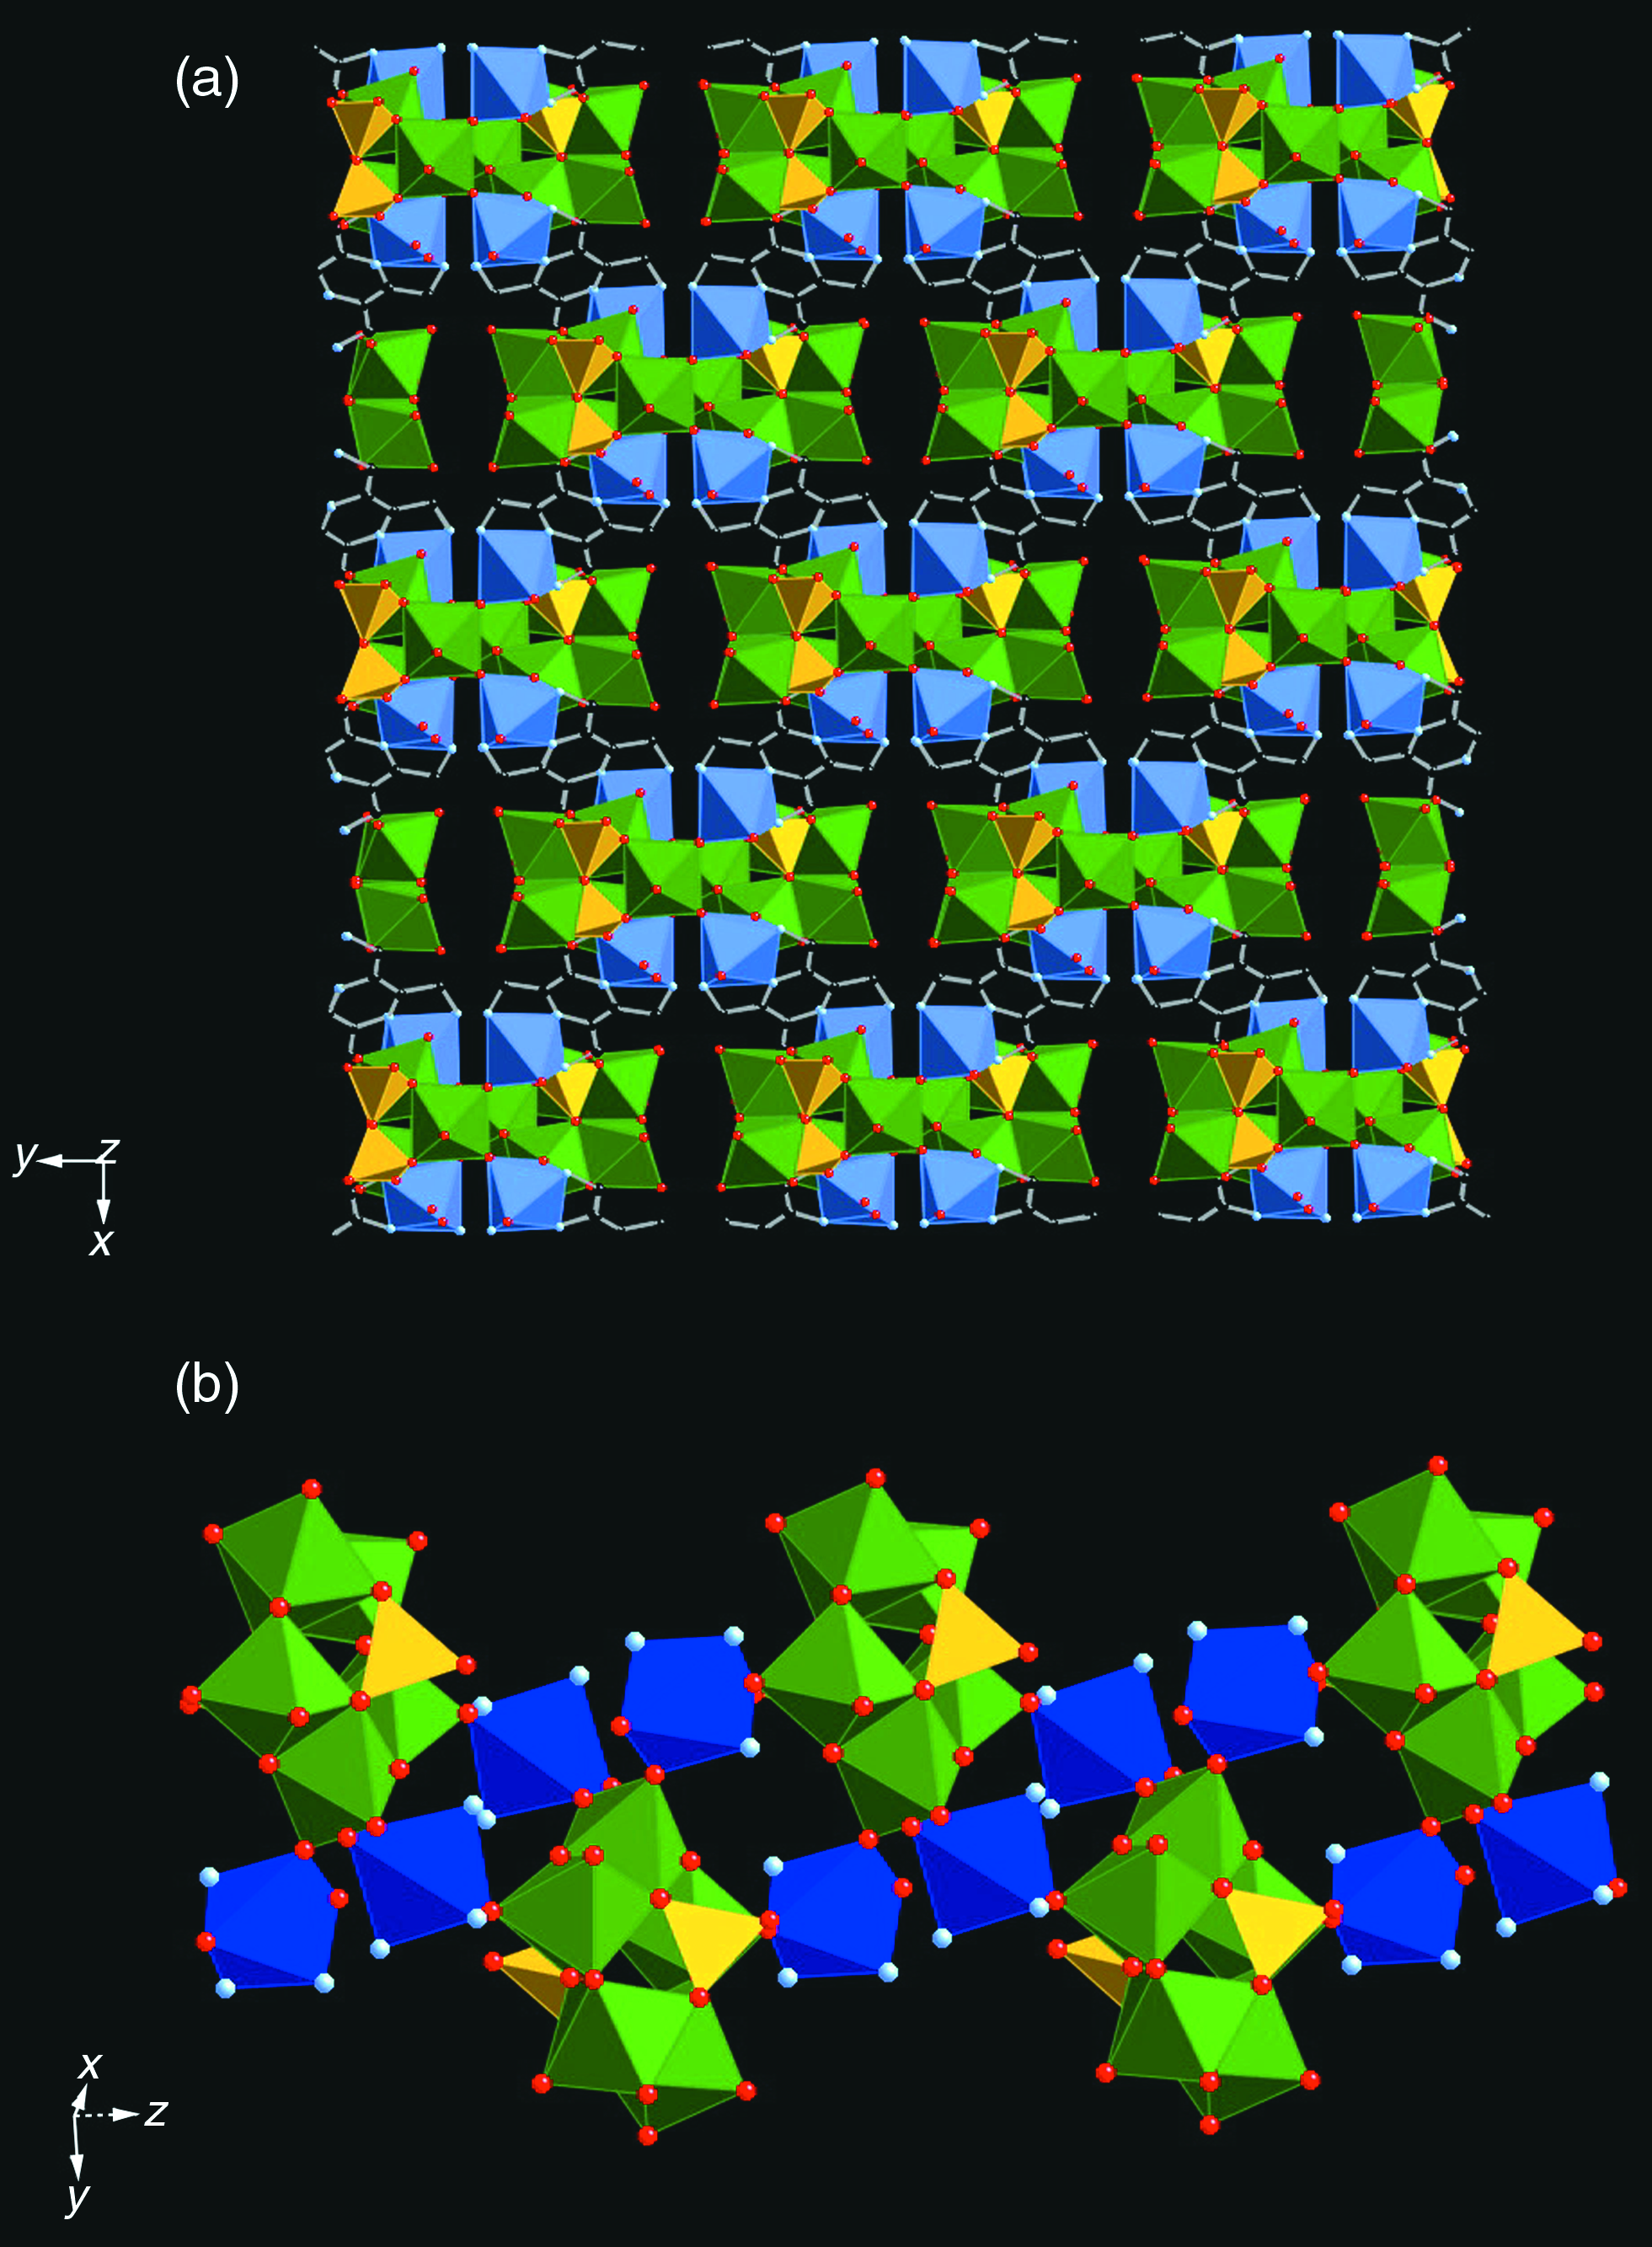


**Fig. 2** (a) Polyhedral representation of the 3D structure of **2**·3H2O viewed parallel to the *c* axis. (b) View of the 1D chain {Cu2Mo5O15(HOPO3)2} substructure of **2**. Color scheme as for Fig. 1.
